# Supplementary material for: Spatial characterization and quantification of CD40 expression across cancer types
Source: Research Square preprint supplement (doi:10.21203/rs.3.rs-2191805/v1), 2022-11-15
Supplement: Supplementary file 1 [file 552643e023e8651df1a30cd6.pdf]

# CD40 paper supplementary figures

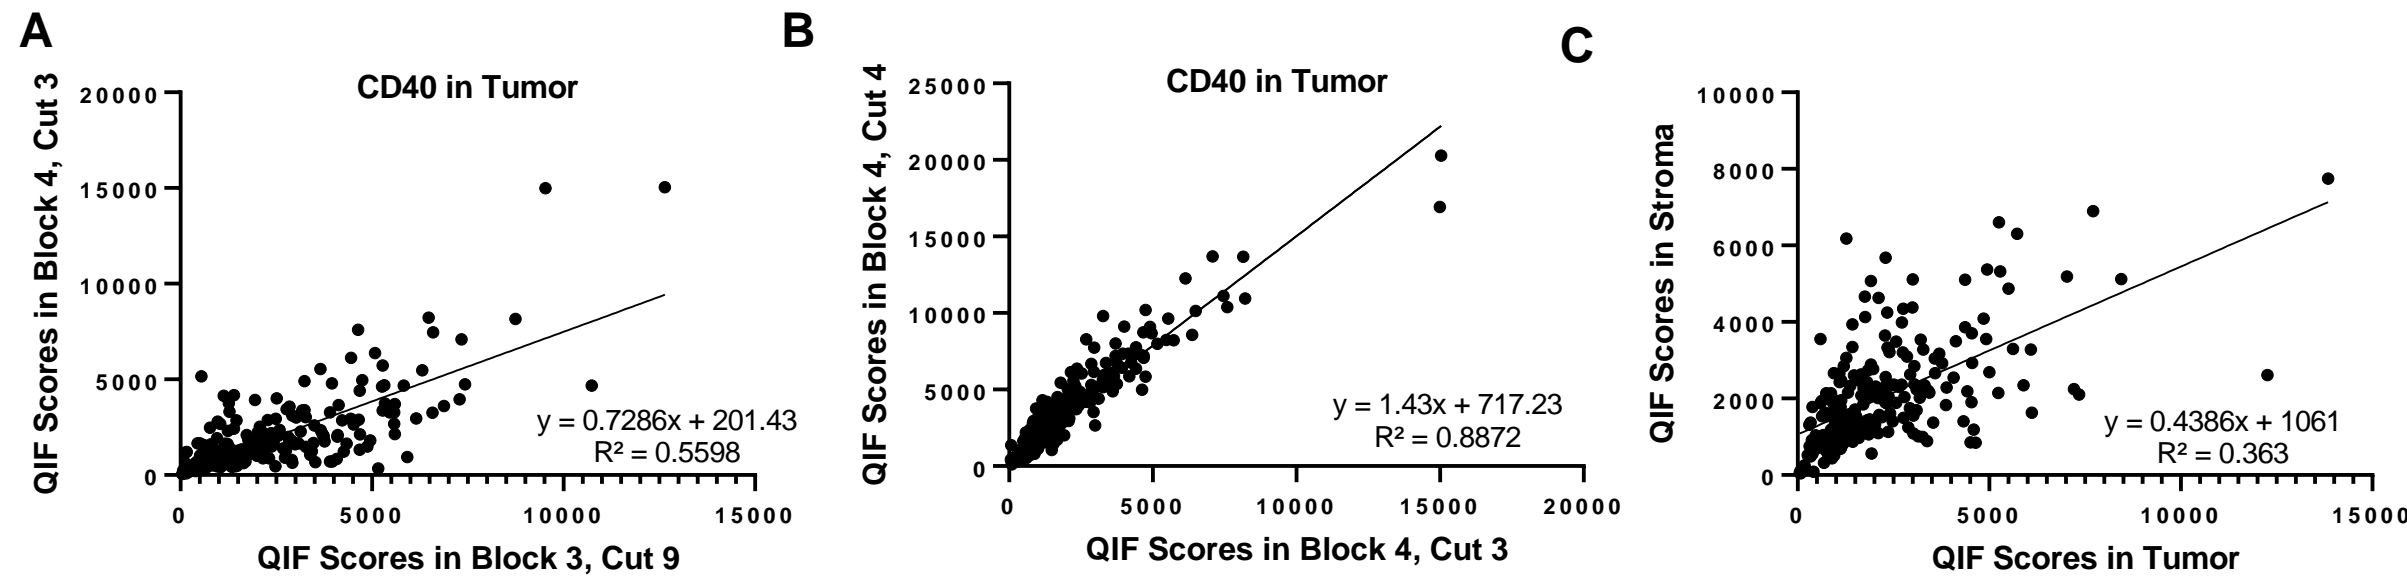

**Supplementary Figure 1.** Regressions from the NSCLC cohort data showing (A) heterogeneity between blocks in tumor, (B) reproducibility of QIF scoring in the tumor compartment, and (C) the correlation between CD40 expression in tumor versus stroma.

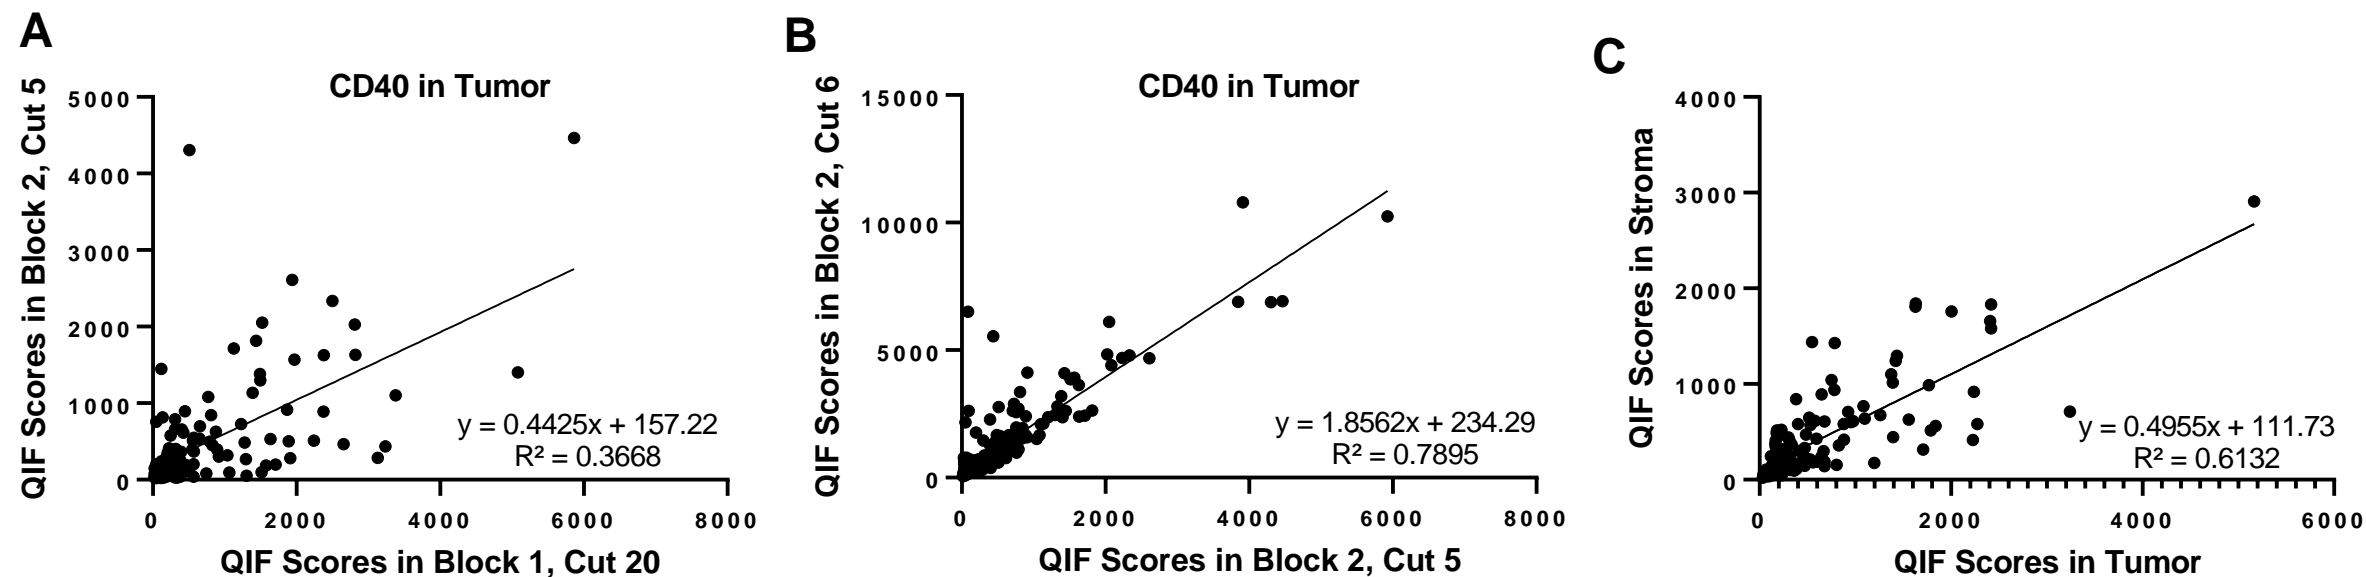

**Supplementary Figure 2.** Regressions from the ovarian cancer cohort data showing (A) heterogeneity between blocks in tumor, (B) reproducibility of QIF scoring in the tumor compartment, and (C) the correlation between CD40 expression in tumor versus stroma.

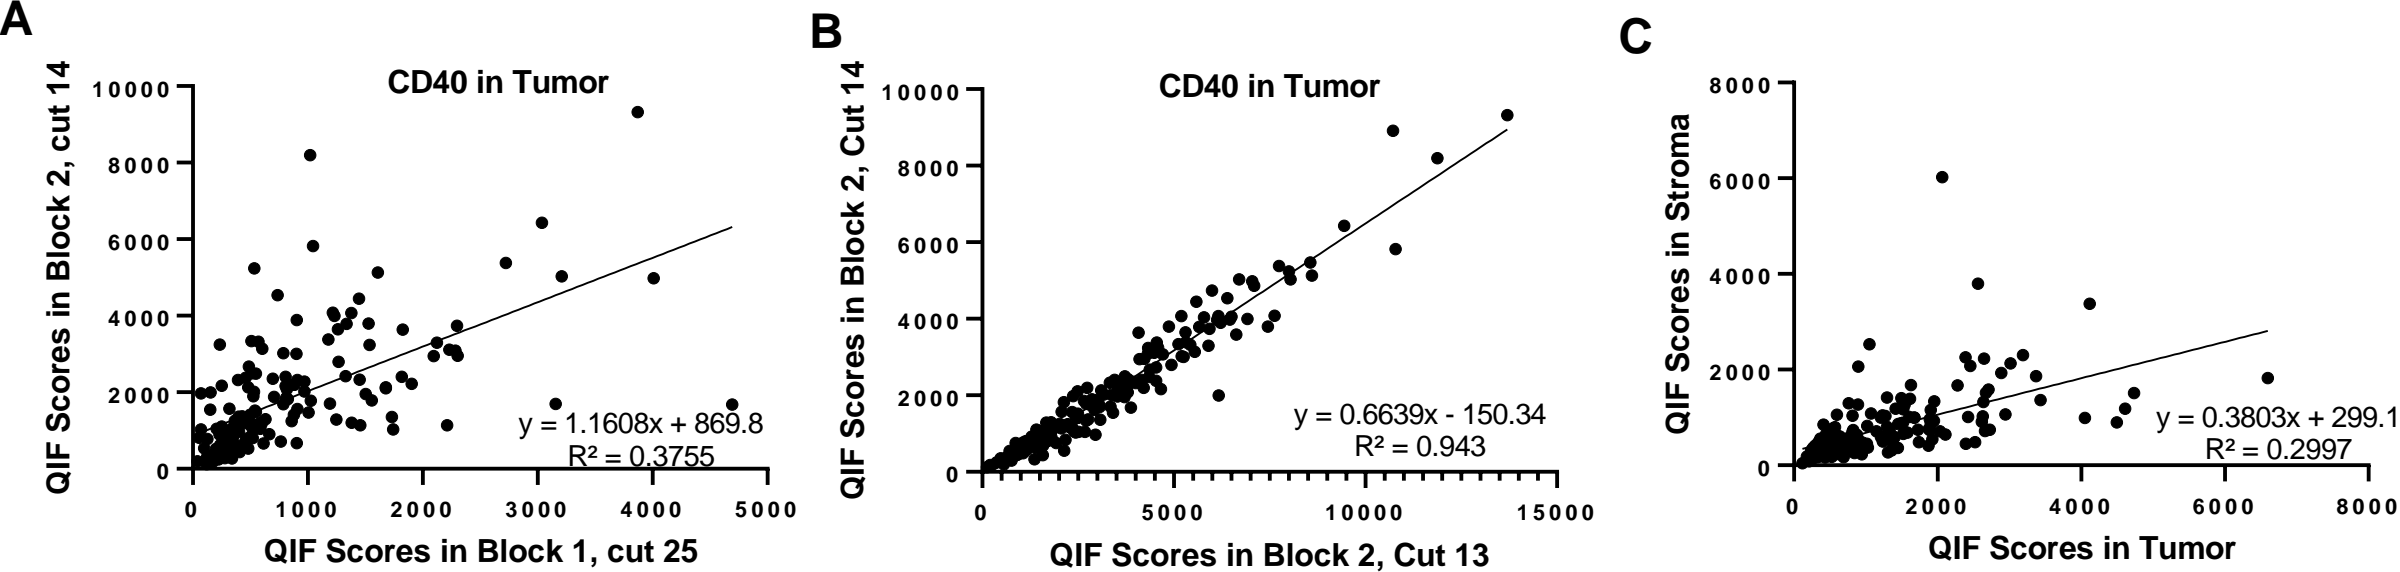

**Supplementary Figure 3.** Regressions from the pancreatic cancer cohort data showing (A) heterogeneity between blocks in tumor, (B) reproducibility of QIF scoring in the tumor compartment, and (C) the correlation between CD40 expression in tumor versus stroma.
